# Supplementary material
Source: publisher figshare collection journal article supplement (https://sage.figshare.com/ndownloader/files/13853891)
Supplement: Supplementary file 1 [file 13853891]

**Saqueo, devastación ambiental y recolonización de territorios indígenas**

**La frustrada nacionalización de los hidrocarburos en Bolivia**

Jeppe Krommes-Ravnsmed

## **Introducción**

### ***Políticas de saqueo***

Los efectos negativos de la explotación de hidrocarburos, de carácter económico, social y ambiental, son, según Seoane (2013), *“una necesidad propia del proceso de acumulación capitalista en curso”,* lo que se ha denominado extractivismo en la literatura latinoamericana. El extractivismo se basa en la extracción intensiva o de gran escala de recursos naturales, orientada a la exportación sin procesamiento industrial (o muy poco). Gudynas (2011) distingue entre el extractivismo clásico relacionado con políticas neoliberales, de transnacionalización y privatización, mientras en el llamado neo-extractivismo progresista el estado tiene un protagonismo mayor, y se defiende el extractivismo con el argumento de querer combatir la pobreza y fomentar el desarrollo nacional. Pero, aunque es cierto, que el extractivismo se realice bajo estrategias diferentes, es importante notar que se repiten los impactos sociales y ambientales, y al mismo tiempo se acentúa la inserción subordinada en el mercado internacional (Seoane, 2013).

Siguiendo Watts (2009), “*oil politics…works through complex forms of dispossession”.* Harvey (2003) ha explicado estos mecanismos bajo la rúbrica de "acumulación por desposesión". Este proceso, que puede considerarse como la continuación de lo que Marx llamó acumulación primitiva, puede adoptar muchas formas, por ejemplo, mercantilización, privatización, erosión de los derechos de bienestar y procesos de apropiación de bienes (incluidos los recursos naturales) (Harvey, 2003).

La historia de Bolivia esta lleno de ejemplos de estas políticas de saqueo. Porque desde la época colonial, cuando se descubrieron las fértiles minas de plata en Potosí, Bolivia ha sido víctima de un saqueo inmenso de recursos naturales. Como escribió el uruguayo Eduardo Galeano (2004) en referencia a la región: ”*nuestra riqueza ha generado siempre nuestra pobreza para alimentar la prosperidad de otros: los imperios y sus caporales nativos”.*

Los hidrocarburos, es decir el petróleo y el gas, han jugado un papel crítico en la historia de Bolivia. El descubrimiento de petróleo en el sur de Bolivia provocó una guerra con el vecino país de Paraguay (la Guerra del Chaco de 1932-1935), donde 50 mil bolivianos perdieron su vida. Luego de la guerra, en 1937, se nacionalizó el petróleo y confiscó los bienes de Standard Oil, y se fundó la empresa estatal Yacimientos Petroleras Fiscales de Bolivia (YPFB). Veinte años después los hidrocarburos pasaron nuevamente a manos privados, cuando se entregó las reservas de petróleo y gas a manos de Gulf Oil. Esta empresa estadounidense tenía el control de la industria hasta 1969, cuando se produjo la segunda nacionalización de los hidrocarburos. Pero pocos años después, en 1971, hubo un golpe de estado, y bajo la dictadura de General Hugo Banzer se volvió a entregar los hidrocarburos en concesión a empresas extranjeras (Puente, 2011).

En 1996, bajo un gobierno neoliberal, se privatizó varias empresas públicas, entre ellas YPFB, que quedó como una empresa residual, después que se había vendido sus principales unidades de negocio. También se aprobó una nueva ley de hidrocarburos que significó la reducción de impuestos de 50% a 18% (Puente, 2011). Mientras las ganancias de las empresas privadas se multiplicaron, el estado quedaba con un déficit por la disminución de ingresos. Como resultado el estado boliviano se vio obligado a pedir nuevos préstamos del Banco Mundial y FMI, que en cambio dictaban recortes en los presupuestos públicos e introducción de nuevos impuestos, que iba a tener mayor impacto para los más pobres (Spronk and Webber, 2007). Como consecuencia de esta política neoliberal, entre 1998 y 2003, la cantidad de pobres aumentó con más de 800.000 personas en Bolivia (Tabera, 2004) de una población total de 8,2 millones habitantes en 2001 (Erbol, 2012). Entonces la forma de acumulación por desposesión que tuvo lugar era de gran escala.

### ***De la Guerra del Gas al ascenso de Evo***

En 2003, el presidente Gonzalo Sánchez de Lozada impulsó un plan para exportar el gas natural a Estados Unidos a través del puerto chileno de Arica. Pero estos intentos de profundizar la extranjerización y el despojo de los hidrocarburos en Bolivia desencadenaban la llamada Guerra del Gas en septiembre y octubre de 2003. Una lucha que fue reprimida violentamente y tuvo un saldo de más de 70 muertos. El presidente tuvo que huir a Estados Unidos, y su vicepresidente, Carlos Mesa, asumió el cargo. En 2004 Mesa llamó a un referéndum sobre el destino del gas, donde la mayoría de los votantes respondieron que estaban a favor de la propuesta de subir nuevamente los impuestos de 18% a 50%. Esa determinación fue plasmada en una nueva ley de hidrocarburos, que se presentó en 2005. Pero para el presidente y las empresas petroleras, esta ley era excesiva, y las fuerzas conservadoras del país presionaban para que el presidente vete la ley (Gordon and Luoma, 2008). Por otra parte, los movimientos sociales se movilizaron nuevamente, exigiendo la renacionalización inmediata, la expulsión de las transnacionales, la retoma del papel del YPFB anterior al neoliberalismo y la industrialización del gas (Gutiérrez, 2005). El parlamento y el congreso se vieron obligados a promulgar la nueva ley de hidrocarburos.

Pero eso no calmó las protestas, que se habían masificado a lo largo del país, y a inicios de junio 2005 Bolivia estaba totalmente bloqueada en más de 70 puntos de carreteras. La Paz estaba cercado desde la ciudad de El Alto, que llevaba más de dos semanas de paro indefinido (Bolpress, 2005), y en varias partes del país campesinos habían tomado el control de pozos gasíferos y otras instalaciones (Gutiérrez, 2005). Este camino desembocaba directamente en el asunto del poder y de la fuerza. Esto lo sabían las transnacionales, y también el presidente Carlos Mesa, quien manifestó *“lo de la ley ahora es secundario”* (Figueras, 2005). Con el fin de buscar una salida constitucional a la crisis Mesa renunció (Gutiérrez, 2005). Como dijo Miguel Zubieta, el ejecutivo de la Federación de Trabajadores Mineros de Bolivia, en una masiva marcha de 500.000 personas en la ciudad de La Paz; “*Las petroleras quieren otro payaso en el gobierno para defender sus intereses, pero nosotros haremos el nuevo gobierno del pueblo que surge hoy de la Asamblea Popular bajo la línea de la nacionalización de los hidrocarburos”* (Econoticiasbolivia, 2005a)*.*

En esta situación el diputado Evo Morales, líder del partido Movimiento Al Socialismo (MAS), que aspiraba a ser el nuevo presidente, demandó públicamente a las organizaciones sociales a levantar los bloqueos y dar una tregua. Como el MAS tenía cierto control sobre sectores campesinos de los valles y en el oriente del país, y también por el cansancio de las bases movilizadas por el ciclo de protestas casi constantes desde 2000, se hizo muy difícil continuar la lucha (Econoticiasbolivia, 2005b). Pero, aunque Evo no había apoyado la idea de nacionalizar los hidrocarburos (Gordon and Luoma, 2008), él *“tuvo que recorrerse hacia la izquierda, al menos temporalmente (…) a fin de no perder su capacidad de influir en el conjunto de los acontecimientos”* (Gutiérrez, 2005). Por eso decidió utilizar la consigna de “nacionalización de los hidrocarburos” en su programa electoral para las elecciones en diciembre 2005 (MAS-IPSP, 2005). Alrededor de este programa, que también hablaba de una reforma agraria y una asamblea constituyente, el MAS logró aglutinar la mayor parte de los movimientos sociales y así consiguieron una victoria electoral (Puente, 2011).

### ***La profundización del modelo extractivista***

Evo prometió acabar con el saqueo de Bolivia e industrializar y diversificar la economía. Pero en realidad, las políticas públicas han profundizado el patrón primario exportador (Escobar de Pabón et al, 2014). En los primeros 9 años de gestión de Evo Morales se experimentó una mayor generación de ingresos (fig. 1). Eso se debe a la creación del Impuesto Directo a los Hidrocarburos (IDH), vigente desde 2005, por el incremento de precios internacionales (INE, 2018a) y por los mayores volúmenes de producción (INE, 2018b). Entonces, durante este periodo de bonanza económica se fortaleció la ilusión de que era posible acabar con el saqueo, sin enfrentarse con las transnacionales. Como dice Brand et al (2016), *“It would seem that Latin America´s veins were open once again (…) but this time, at least in some respects, positively and under different conditions”.* Pero la debilidad de este modelo extractivista nuevamente se ha hecho visible cuando cayeron los precios internacionales que provocaron la caída abrupta de la renta petrolera en Bolivia a partir de 2014 (fig. 1).


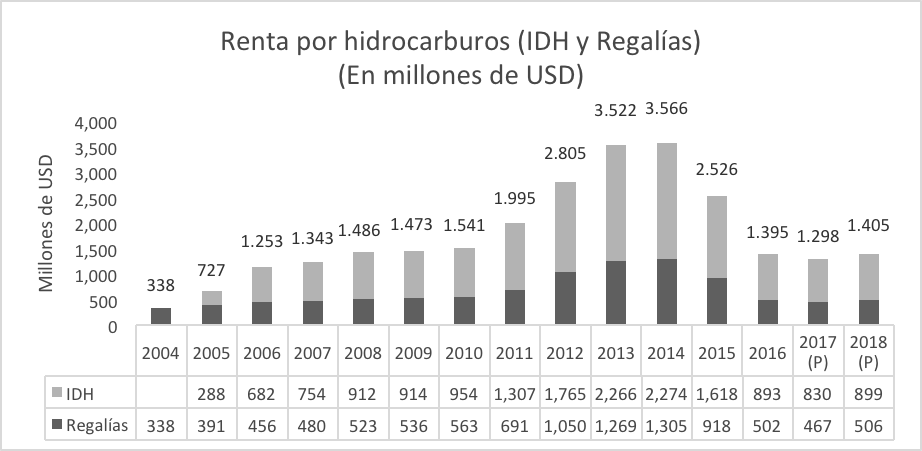


Fig. 1 Renta por hidrocarburos (Impuesto Directo a los Hidrocarburos (IDH) y regalías). Datos de 2017 y 2018 son preliminares. Fuente: Jubileo (2018).

Como respuesta al declive de los precios de gas y petróleo, el gobierno quiere aumentar los volúmenes de exportación. Como dice el investigador Jorge Campanini del Centro de Información y Documentación de Bolivia (CEDIB); *“En el plan nacional de desarrollo 2015-2020 y la agenda 2020-2025, lo que indican es que vamos a hacer más proyectos, más exploración, más extracción, y si se acaba el gas y el petróleo, ahora vamos a vender electricidad. Pero la idea es el mismo”* (Entrevista, Cochabamba, 27 de julio 2016).

Después de la caída de los ingresos de los hidrocarburos en el año 2014, el gobierno ha aprobado un paquete de normativas que da mejores incentivos a las empresas petroleras para que inviertan en la exploración. Pero como dice el Director Ejecutivo de la Cámara Boliviana de Hidrocarburos y Energía (CBHE), Yussef Akly, *“Para las petroleras, es una época muy complicada. Entonces, para atraer inversiones, el gobierno tiene que ofrecer condiciones que son realmente competitivas”* (Entrevista, Santa Cruz, 29 de julio 2016).

### ***Las Limitaciones estructurales para el cambio***

Queda abierta la cuestión de *por qué* el gobierno de Evo Morales no ha logrado superar el extractivismo, como fue planteado en el primer Plan Nacional de Desarrollo del 2006, y por qué ahora se está cumpliendo con una agenda que coincide muy bien con los intereses de las petroleras. Algunos autores han ofrecido explicaciones que enfatizan las limitaciones estructurales, incluyendo *“the path-dependent effects of Bolivia’s previous neoliberal policies and the sociomaterial constraints of natural-gas extraction, transport, and use”* (Kaup, 2010). Y según Kohl y Farthing (2012), la dependencia de la renta petrolera *“can undermine the development of the institutional capacity necessary to take full advantage of those same resources”.*

Otros autores como Webber (2017) y Andreucci (2016) han analizado el “proceso de cambio” en Bolivia con inspiración de Gramsci y sus conceptos de “revolución pasiva” y “transformismo”. Un proceso donde *“el cambio social no llegó a alterar de forma suficientemente profunda las relaciones económicas y políticas dominantes, se produjo una restauración o incluso consolidación de correlaciones de fuerzas previamente existentes*” (Andreucci, 2016). Mientras Webber ha definido el proyecto del Movimiento Al Socialismo (MAS) como neoliberal (Webber, 2009), Andreucci considera, en una entrevista con Zegada (2015), que el MAS *“ha actuado como mediador entre demandas radicales procedentes de los sectores populares movilizados en contra del neoliberalismo y los sectores dominantes”.* Bajó presión de los movimientos sociales, a veces se ha visto obligado a inclinarse más hacia la izquierda, y en otros momentos, ha pactado con sectores capitalistas nacionales y transnacionales al momento de implementar sus reformas.

Para entender mejor donde ha fallado el gobierno de Evo Morales en una transformación profundo de la sociedad boliviana, pienso que es importante analizar una serie de factores económicos y políticos, que están dialécticamente relacionados; 1) los contratos petroleros del 2006, que permitió que las petroleras conservaban una posición dominante en el sector, 2) la falta de inversión en actividades de exploración, que ha puesto en peligro los compromisos de exportación de gas 3) la alta dependencia de la renta petrolera en los ingresos públicos, ya que no se ha logrado cambiar la matriz productiva, 4) y el proceso de degeneración política que se ha vivido en el MAS.

## **Impactos del modelo extractivista bajo el gobierno de Evo Morales**

### ***Economico y social***

Entre 2005 y 2016 el índice Gini en Bolivia bajó de 58,5 a 44,6 (World Bank, 2018), y la incidencia de pobreza extrema cayó de 38,2% a 18,3% entre 2005 y 2016 (Jubileo, 2017b). Pero en el Censo de Población y Vivienda en Bolivia del año 2012, sólo 25% de la población tiene sus necesidades básicas satisfechas (INE, 2012). Eso, paradójicamente, es algo muy visible en las comunidades guaranís donde se encuentra los campos gasíferos más grandes donde la tasa de pobreza supera la tasa promedio de sus respectivos departamentos (Arze, 2018).Como afirma el dirigente del Consejo de Capitanes Guaraní de Tarija (CCGT), Tomás Araray; *“estas comunidades no tienen agua potable, no tienen energía eléctrica, no tienen camino para llegar a estos territorios, han perdido las aguas superficiales, las quebradas, por consecuencia de las actividades petroleras, y las ganancias, por el tema de los hidrocarburos, son los que no se ven hasta ahorita”* (Entrevista, Tarija, 28 de julio 2016). Parte de la explicación de esta situación es que la explotación de hidrocarburos, por ser intensiva en capital, solamente ha generado bajísima demanda de mano de obra local en Bolivia (Arze, 2018).

### ***Medio ambiente***

En 2015 el gobierno aprobó tres decretos que abre las áreas protegidas y territorios indígenas a la explotación petrolera, debilitando la consulta previa y permitiendo mayores niveles de contaminación (GoB, 2015a; 2015b, 2015c). Como dice Yussef Akly de CBHE, *“el gobierno ahora entiende las necesidades que tienen las empresas”* (Entrevista, Santa Cruz, 29 de julio 2016). La ampliación de la frontera petrolera a casi 32 millones de hectáreas pone en peligro ecosistemas frágiles y comunidades indígenas. Concretamente el gobierno ha permitido actividades hidrocarburíferas en 11 de las 22 áreas protegidas de Bolivia, afectando más de 3 millones de hectáreas (Jiménez, 2015), y en 75 de los 223 territorios indígenas que hay en Bolivia (TIERRA, 2011; Paye et al, 2013; Jiménez, 2013; Campanini, 2015).

Rolando Villena manifestó en 2016, mientras ocupaba la función de Defensor del Pueblo en Bolivia (Ombudsman), que estos decretos vulneran 7 artículos de la Constitución de 2009 y 5 tratados internacionales sobre medio ambiente y pueblos indígenas (Erbol, 2016). Pero el gobierno no está dispuesto a retroceder, como afirma el senador de MAS, Pedro Montes; *“Se va a seguir haciendo exploración y explotación en las áreas protegidas. Porque es nuestro trabajo seguir descubriendo materias primas, para el beneficio del pueblo boliviano”* (Entrevista, La Paz, 1 de agosto 2016).

En la nueva constitución del año 2009 se consagró el derecho a la consulta previa. Pero desde 2015 las comunidades afectadas tienen 45 días máximo para llegar a un acuerdo con las petroleras. Y si no llegan a un acuerdo, el ministerio igual va a entregar una licencia ambiental a las empresas, para que puedan seguir *“de manera interrumpida sus actividades, dado el carácter de interés y utilidad pública”* (GoB, 2015a). Otro decreto, 2195 de 2014, ha establecido límites a la compensación económica para las comunidades afectadas que no superan el 1,5 % del total invertido en los proyectos (GoB, 2014).

Estos impactos negativos también han sido revelados por Anthias (2018). Como explica Hernán Ruíz del Consejo de Capitanes Guaraní de Tarija (CCGT), “*las actividades extractivas han generado impactos ambientales bastante severos en algunas zonas. Y esto ha tenido impacto en la economía de manera negativa. Porque se han afectado sus fuentes de agua, sus áreas de caza, pesca, y de cultivo. También es importante el impacto negativo que tiene la industria sobre la cultura y su forma de vida dentro del pueblo guaraní”* (Entrevista, Tarija, 28 de julio 2016). Y esto también preocupa a Lucio Ayala, el ahora ex presidente de la Confederación de Pueblos Indígenas de Bolivia (CIDOB), *“con estos proyectos de exploración de hidrocarburos en las comunidades va a haber migración, va a haber expulsión del movimiento indígena. El gobierno no mira justamente estos peligros, lo que solamente quieren es el desarrollo”* (Entrevista, Santa Cruz, 30 de julio 2016).

El nuevo reglamento ambiental para el sector de hidrocarburos, que fue aprobado en 2015 (GoB, 2001, 2015c), permite un más alto nivel de contaminación petrolera que en el viejo reglamento de 2001 en cuerpos de agua con los llamados btex (benceno, tolueno, etilbenceno y xileno), que son algunas de las sustancias más peligrosas de los residuos de petróleo (Mollo, 2011). Eso es preocupante, porque ya se ha comprobado que comunidades ubicadas en un radio de 30 km alrededor de los campos de extracción de petróleo consumen agua con diferentes compuestos contaminantes de la industria petrolera (Gonzáles et al, 2010). Para el MAS, *“no es una imposición del estado, sino una necesidad del pueblo boliviano”* (Pedro Montes, Entrevista, La Paz, 1 de agosto 2016).

## ***Las transnacionales siguen dominando***

Una nacionalización implica que el estado recupera el control, no solamente de la comercialización, sino también de la exploración y explotación de hidrocarburos, como dice Arze (2013); *“La nacionalización permite establecer qué cosas se produce y para qué propósitos, además controlar el excedente económico que se genera en un sector”.* El primero de mayo 2006 el gobierno de Evo Morales proclamó la tercera nacionalización de los hidrocarburos (GoB, 2006a). Pero en esta ocasión no hubo confiscación de bienes. A finales del año 2006 ninguna de las 17 empresas privadas de la industria petrolera había dejado el país. Solo hubo renegociación de 44 contratos, donde se determinaba que las empresas privadas tenían que adecuarse a la nueva ley de hidrocarburos del año 2005, lo que significa pagar los 18% en regalías más 32% extra en el nuevo Impuesto Directo a Hidrocarburos (IDH) (Paz and Ramírez-Cendredo, 2018). Además, se procedió a pagar más de 2,5 billones de dólares en compensación, para comprar 50% más 1 de las acciones de las empresas subsidiarias de YPFB, que habían sido privatizados en los años noventa (Fernández, 2016).

Los nuevos contratos establecían una participación de YPFB en las ganancias de las transnacionales, ya que ellas ahora son sus “socias”. Las transnacionales se encargan del parte ‘upstream’ (exploración, perforación y producción), y luego tienen que entregar toda su producción a YPFB, que se encarga del ´downstream´ (refinación y comercialización) (Jubileo, 2012). Pero todos los riesgos de la inversión petrolera se transfieren a YPFB al reconocer la totalidad de los gastos de las empresas transnacionales, los llamados “costos recuperables”. Esto quiere decir, que YPFB paga por los salarios, maquinas, gastos de transporte etc. de las empresas (CEDLA, 2007). Con este arreglo, las transnacionales se han quedado con una ganancia de casi 800 millones de dólares en promedio cada año desde 2006 a 2016 (Jubileo, 2017a). Esto explica porque estas empresas quieren ser “socias” de YPFB, y eso demuestra que siguen saqueando a Bolivia.

El decreto de nacionalización determinó la realización de auditorías petroleras a todas las empresas que operaban en el país. Y estas auditorías, efectuadas por el ministerio de Hidrocarburos, revelaban que las empresas petroleras habían incumplido los contratos anteriores, hecho muy pocas inversiones, dañado el medio ambiente (Hora 25, 2008) y los impuestos no pagados por evasión fiscal sumaron 1,74 billones de dólares (Soliz Rada, 2008). Como indica Orgáz (2011 y 2012), el gobierno ha perdido mucho por no realizar una expropiación completa de las empresas transnacionales, igual como se hizo en 1969, cuando se nacionalizó Gulf Oil.

El resultado de la política hidrocarburífera del gobierno de MAS es que las transnacionales han conservado una posición dominante en el sector. Y en 2015 se aprobó la llamada ley de incentivos, que determina que las transnacionales van a recibir un precio más alto por su producción de líquidos, es decir los condensados de gas y el petróleo (GoB, 2015d). Las transnacionales tienen que vender estos líquidos a un precio fijo de 27,11 dólares por barril en el mercado interno, y entonces se quedan con 13,56 dólares después de pagar los 50 % en impuestos (regalías y IDH). Pero ahora, con la ley de incentivos, reciben entre 30 a 55 dólares extra por cada barril, dependiendo del precio en el mercado internacional, y así pueden quedar con una ganancia de hasta 68,56 dólares el barril (Arze, 2015). Estos incentivos no solamente se dan para la producción en nuevas áreas, para de este modo incentivar a la inversión en exploración, sino también para la producción en las áreas existentes. Por eso no sorprende que el presidente de Repsol, Antonio Brufau, ha dicho que considera a Bolivia como *“un páis magnífico para invertir”* (Página Siete, 2015).

Los incentivos van a ser financiado con parte del dinero que las mismas empresas pagan en impuestos, ya que se reserva 12% del IDH para este propósito (GoB, 2015d). Como dice Jiménez (2015); *“Esto, en la práctica no es otra cosa que la expropiación al pueblo boliviano de un porcentaje de los recursos que por ley debe obtener por la actividad de extracción hidrocarburífera”.* Por efecto, en la gestión 2016, el estado ya no recibió 50% del valor total de los ingresos por venta de hidrocarburos, sino solamente 44,6 %, mientras que las transnacionales obtuvieron 40,8 % y YPFB el 14,6% de estos ingresos (Jubileo, 2017a).

Pedro Montes, senador de MAS, indica; *“Que me importa lo que se ha disminuido. No va a tener ningún impacto”* (Entrevista, La Paz, 1 de agosto 2016). Pero por este déficit que genera la ley de incentivos ya se ha visto paralización de obras y eliminación de proyectos en los municipios (Jorge Campanini, Entrevista, 27 de julio 2016). Y esto viene encima de la disminución de ingresos por efecto de la caída de los precios internacionales de hidrocarburos. En la gestión de 2018, en comparación con el nivel más alto que se registró el 2014, las gobernaciones departamentales tendrían una caída de ingresos fiscales de 57% y los gobiernos municipales de 33% (Jubileo, 2018). Por eso, *“son lógicas que se usaban en la época neoliberal, es decir, le cargas el peso a la población. Existe un déficit, pero le vamos a cargar el peso a la población, mientras el Estado incentiva con ese dinero a las empresas a que hagan algún tipo de trabajo o exploración,”* dice Jorge Campanini (Entrevista, 27 de julio 2016).

## ***El desafío de encontrar nuevas reservas de gas***

Ahora el gobierno se enfrenta con el enorme desafío de encontrar nuevas reservas de gas para poder seguir exportando los volúmenes actuales (Trigo, 2017). El problema es, que en los contratos petroleros de 2006 no se establecía compromisos y garantías de inversión (Paz and Ramírez-Cendredo, 2018). Las petroleras solo hicieron inversión en actividades de explotación de las reservas conocidas, ya que eso les permitió aprovechar los altos precios internacionales de hidrocarburos que se experimentó en los primeros 9 años de gestión de Evo Morales. Sin embargo, *”el perjuicio fue para la actividad de exploración, la cual fue descuidada y a la fecha enfrenta a las autoridades nacionales al enorme desafío de no sólo reponer el consumo de los últimos años, sino también de incrementar las reservas certificadas, a fin de garantizar el cumplimiento de contratos suscritos con Argentina y el nuevo que se vaya a negociar con Brasil, considerando que el actual contrato vence el año 2019”* (Jubileo, 2016). Aparte del mercado externo, también se tiene un mercado interno de gas que se ha triplicado entre 2005 y 2017, y eso va a seguir creciendo por los programas del gobierno de redes de gas natural, de gas natural licuado, y de generación eléctrica (Jubileo, 2018). Por eso se necesita encontrar nuevas reservas, *“pero descubrirlos es caro y complicado”,* según Yussef Akly, el director de la cámara de hidrocarburos en Bolivia (CBHE) (Entrevista, Santa Cruz, 29 de julio 2016).

Desde el 2005 se ha empezaba a reservar nuevas áreas de exploración y explotación para YPFB. En 2015 el número de áreas reservadas para YPFB llegó a 99, que en total suma más de 29 millones de hectáreas (Campanini, 2015). Si a eso sumamos las áreas donde las empresas petroleras tienen contratos de operación (Jiménez, 2013), la nueva frontera hidrocarburífera llega a casi 32 millones de hectáreas, lo que equivale a más de 29% del territorio de Bolivia (Campanini, 2015). Esta ampliación de la frontera petrolera pone en peligro parques nacionales, ecosistemas frágiles y gran parte de los territorios indígenas.

YPFB ha realizado muy poco hasta la fecha en las áreas reservadas. Según Yussef Akly de CBHE, este resultado *“era lógico de esperar”*, porque *“una empresa pública siempre es más burocrático, más pesada, porque tiene que conseguir autorización, porque tiene que conseguir los presupuestos, hay que ir al congreso”* (Entrevista, Santa Cruz, 29 de julio 2016). Por lo tanto, el gobierno decidió buscar nuevos socios entre las transnacionales quienes han respondido al gobierno, que, si quieren nuevas inversiones en esa zona exploratoria, *“tienen que ir perfeccionando la normativa y las condiciones de competitividad”* (Yussef Akly, Entrevista, Santa Cruz, 29 de julio 2016). El resultado es que el gobierno ahora está *“cumpliendo al pie de la letra una agenda impuesta por las petroleras”*, según Patricia Molina, la directora del Foro Boliviano sobre Medio Ambiente y Desarrollo (Entrevista, La Paz, 1 de agosto 2016).

El gobierno ha aceptado el mito de que las transnacionales son necesarias para descubrir hidrocarburos y que el riesgo exploratorio sólo puede ser cubierto por el capital extranjero. Pero un estudio de Gandarillas y Rodriguez (2011) demuestra que *“la antigua YPFB ha sido más eficiente que las empresas extranjeras, ha perforado más pozos y ha tenido más éxitos exploratorios”.* Además, aunque Bolivia tiene importantes reservas de hidrocarburos, eso no justificaría hacer nuevos contratos de exportación.

## ***La alta dependencia en la renta petrolera y la matriz productiva***

En un escenario de altos ingresos, como se experimentó entre 2005 y 2014, se tuvo un significativo crecimiento de gastos corrientes (sueldos, jubilaciones, bonos sociales y otros). Las inversiones públicas también se han multiplicados en la gestión de Evo Morales, de 629 millones de dólares en 2005 a 6.210 millones de dólares programadas para 2018 (Jubileo, 2018).

Sin embargo, existe una alta dependencia para los gastos públicos en la renta petrolera. En promedio, durante los años 2005-2016, la renta petrolera representaba 33% sobre el total de los ingresos de todo el aparato público estatal (Jubileo, 2017a). Esta tasa es entre los mas altos en toda America Latina (Farthing and Kohl, 2014).

El resultado de esta alta dependencia en la renta petrolera es un impacto negativo en periodos con bajos precios internacionales de petróleo, como en los años 2015 a 2018 (INE, 2018a), donde se ha producido altos déficits fiscales. Como consecuencia la deuda externa de Bolivia ha subido a más de 9.500 millones de dólares en 2018. Tan solo en un año, de diciembre 2016 a diciembre 2017, la deuda externa creció 28% (Jubileo, 2018).

No se ha priorizado los sectores que podrían diversificar la economía y generar ingresos y empleo. Entre 2007 a 2011 la inversión pública en la industria solo equivalía a 1,2% de toda la inversión estatal (Escobar de Pabón et al, 2014). Y esa tendencia sigue, porque en 2018 solo se ha reservado 2% de la inversión para la industria (Jubileo, 2018).

El gobierno escribió en su primer Plan Nacional de Desarrollo de 2006, que el patrón primario exportador no sustente el desarrollo nacional, y por lo tanto era necesario diversificar la economía y construir un modelo *“que consiste en la agregación de valor y la industrialización de los recursos naturales renovables y no renovables”.* Este cambio de modelo fue visto como “*una condición imprescindible”* para revertir la desigualdad y erradicar la pobreza en el país. Y además se planteaba que el Estado sea el protagonista y promotor de este nuevo modelo (GoB, 2006b).

El gobierno dice que ha cumplido con la promesa de industrializar el gas, con la construcción de una planta de urea y amoniaco en 2017. Pero menos de 5% de estos fertilizantes van a ser para el mercado interno (Melendres, 2018). Entonces se mantiene el patrón exportador, que muy poco ayuda a sostener un desarrollo nacional.

Bolivia sigue teniendo una economía capitalista atrasada, con baja productividad, donde incrementa los empleos precarios, sujetos a una explotación laboral creciente (Escobar de Pabón et al, 2014). Datos oficiales muestran que el empleo informal se disparó a 75% en 2015 (OIT, 2016). En 2005 la cifra era 59,1% (Yañez and Landa, 2007). Como dice el secretario internacional de la Central Obrera Boliviana (COB), Jaime Quispe; *“El gobierno no tiene políticas de cómo generar economía. Siempre nos han dicho que hay más inversión, pero eso ¿cómo llega a los ciudadanos y ciudadanas? No les llega”* (Entrevista, La Paz, 29 de julio 2016).

Para el investigador Carlos Arze, el problema principal para salir del extractivismo en Bolivia no es la falta de recursos, sino *“una clase social que, dentro del marco del orden establecido, disponga de interés y de poder suficientes para abrirse paso en este punto decisivo”* (Vila and Orgáz, 2014). Desde mi perspectiva, en un país capitalista atrasado como Bolivia, la burguesía es demasiado débil y dependiente de la capital extranjera para poder industrializar y desarrollar el país.

## **La degeneración del MAS**

El gobierno de Evo Morales ahora está cumpliendo con una agenda que coincide muy bien con los intereses de las petroleras. Estas conciliaciones no es un simple resultado de la alta dependencia de la renta petrolera, sino también el producto de un proceso de degeneración política del MAS.

### ***2006-2008: Ataques externos y divisiones internas***

Después de la victoria electoral en 2005, el gobierno tenía el apoyo de las grandes mayorías para impulsar cambios estructurales en el país. Pero internamente en el MAS y en los movimientos sociales, diferentes posiciones se enfrentaban sobre cómo llevar adelante los cambios políticos. Sectores sociales, como la Central Obrera Boliviana (COB), los mineros y el Movimiento Sin Tierra, luchaban por una confrontación más abierta con las transnacionales, los latifundios y la oligarquía nacional. Mientras que los sectores pro-capitalistas del gobierno y del MAS, liderado por el vicepresidente Álvaro García Linera, optó por la vía del diálogo (Krommes-Ravnsmed, 2014). Este conflicto también produjo la salida del gobierno del primer ministro de Hidrocarburos, Andrés Soliz Rada, quien había firmado una resolución ministerial en agosto 2006, que recuperaba el control de las refinerías de manos de Petrobras, para aplicar el decreto de la nacionalización. Pero Brasil se quejaba al vicepresidente, Álvaro García Linera, y el claudicó ante este poder subimperial y congeló la medida que iba a afectar a Petrobras. Como decía Andrés Soliz Rada; *“hubo que enfrentar además de los ataques externos, fuertes trabas internas”* (El País, 2016). Después de su salida del gobiernotrataban de impedir la finalización de las auditorías petroleras, maltrataban los auditores, documentos importantes fueron destrozados, y el encargado de las auditorías, Enrique Mariaca, incluso sufrió un asalto violento, que le impidió seguir trabajando temporalmente. Porque, según Soliz Rada, *“los avances de las auditorías preocuparon al grupo palaciego”*, y cuando las autoridades empezaban a recibir los primeros resultados de las auditorías se impuso una censura interna y un arreglo precipitado de contratos con las petroleras (Sagárnaga, 2010). Estos hechos reflejan la batalla interna en el MAS y en los Movimientos Sociales, entre posiciones reformistas y posiciones más radicales. Durante 2007 y 2008, en el pueblo de Camiri, conocido como la capital petrolera de Bolivia, hubo huelgas y bloqueos de carretera, para exigir una “verdadera nacionalización” de los hidrocarburos (Petropress, 2008). Como dijó Mirko Orgáz, vicepresidente del Comité Cívico de Camiri; *"Evo nos ha dado 'gato por liebre', la verdadera nacionalización quiere decir que se expropien los capitales de las trasnacionales y eso no se ha hecho"* (BBC, 2007).

Pero las vacilaciones del gobierno fortalecieron la derecha opositora que logró rearticularse en los dos primeros años de gestión de Evo. Desde sus bastiones en la parte oriental del país la derecha orquestaba un movimiento separatista, y en la primera mitad de 2008 organizaban referendos autonómicos en los departamentos de Santa Cruz, Tarija, Beni y Pando. Con la aprobación de estatutos autonómicos querían obligar al gobierno a la concertación, para modificar la propuesta de una nueva constitución, que iba a afectarles en el tema de tenencia de tierra y propiedad de los recursos naturales. Algunos exponentes del gobierno declaraban disponibilidad de diálogo, pero los referendos se encontraron con resistencia popular y movilizaciones en todo el país. Y luego, el 10 de agosto se llamó a un referéndum revocatorio, donde más de dos tercios respondieron “sí” a la continuación de Evo. Los movimientos sociales tenían la expectativa de que ya no había más alibis para avanzar con cambios estructurales (Schlez, 2008). Pero la oligarquía, apoyado por el imperialismo a través de la Embajada de los EEUU, intentaron orquestar un golpe en los departamentos de Santa Cruz, Tarija, Beni y Pando (Schlez, 2008). Entre el 9 y 11 de septiembre de 2008, avasallaron instituciones del estado, tomaron control con los aeropuertos, atacaron y ocuparon instalaciones petroleras y gasíferas, y lanzaron ataques contra las sedes de los movimientos sociales y oficinas de canales de radio y la televisora estatal. En el departamento de Pando, el 11 de septiembre 2008 hubo una matanza de 30 campesinos. Bolivia estaba al borde de una posible guerra civil (Fuentes and Munckton, 2008).

En este escenario el canciller de Brasil, Celso Amorim, declaró, *”if Morales fails to secure the pipeline, Brazil may open its own contacts with the eastern governors”* (Arostequi, 2008). Pero en el barrio pobre y populoso de la ciudad de Santa Cruz de la Sierra, llamado Plan 3000, los movimientos sociales resistían los ataques de la derecha, e hicieron un llamado al pueblo de Bolivia para que se movilice (Zibechi, 2009). Miles de campesinos, mineros y trabajadores empezaron un cerco a Santa Cruz, para “tomar latifundio y fábricas”, como se lee en un documento firmado por COB y la Coordinadora Nacional por el Cambio (Bolpress, 2008). Esta movilización hizo fracasar el golpe de estado, pero el gobierno detuvo las movilizaciones e invitó a la derecha a negociar cambios en la propuesta de nueva constitución, antes de llevarlo a un referéndum (ABI, 2008a). La derecha logró modificar 146 de los 411 artículos del texto aprobado en la asamblea constituyente en 2007 (ABI, 2008b). En el tema de los hidrocarburos, se plantea su nacionalización, pero la derecha logró introducir un párrafo que dice que *“en ningún caso* (el nuevo régimen jurídico) *supondrá desconocimiento de derechos adquiridos”* (Disposiciones transitorias, octava (I), GoB, 2009). En cambio, en la propuesta de nueva constitución que fue aprobado en la asamblea constituyente, se decía que el Estado tenía que resolver aquellas concesiones sobre recursos naturales *“que contravengan a la presente Constitución”* (Disposiciones transitorias, octava (I), CJA, 2008). Con esta modificación se dejó de hecho el poder de los transnacionales sobre el gas y el petróleo.

### ***2009-2013: Infiltraciones de la derecha y conflictos con sectores sociales***

En las elecciones en diciembre 2009 el gobierno logró un amplio triunfo electoral, obteniendo una mayoría de dos tercios (Cuiza, 2016). Sin embargo, las contradicciones entre las expectativas populares que permitieron al MAS llegar al gobierno y las consecuencias de su política conciliadora crecieron durante la segunda gestión de Evo Morales (Schneider, 2014).

Uno de los conflictos ocurrió en diciembre del 2010, cuando el gobierno lanzó un decreto conocido como el gasolinazo, que eliminaba las subvenciones estatales al precio de gasolina, diésel y otros carburantes en el mercado interno, duplicando prácticamente su costo. La medida debería servir a “incentivar las inversiones” de las transnacionales para que aumenten la producción de gas y petróleo (Pereira, 2010). Pero quien iba a pagar el mayor precio por esta medida era la gente pobre, como todos los productos de la canasta familiar subieron de golpe, después de la promulgación de este decreto (Stefanoni, 2010). Los movimientos sociales lo consideraban como una victoria de las petroleras, y una huelga general de los trabajadores fue determinante en reorientar las decisiones del gobierno, que luego tuvo que abrogar el decreto (Gilbert, 2010; Sosa, 2010).

Los siguientes pares de años se registró varias movilizaciones de trabajadores, campesinos y pueblos indígenas, que intentaron influenciar y orientar las decisiones del gobierno. Por ejemplo, sobre temas salariales, pensiones, y el conflicto de TIPNIS (Schneider, 2014). El ala izquierda del MAS también lanzó un manifiesto, donde proponían “reconducir” el proceso de cambio, en base a una verdadera nacionalización de los hidrocarburos, y mayores esfuerzos para salir del extractivismo (CPR, 2011). El manifiesto fue duramente atacado por el vicepresidente, Álvaro García Linera (García Linera, 2011). Y en general, hubo muy poco debate en el partido sobre la necesidad de una reconducción del proceso de cambio. Una excepción fue en algunos congresos de Juventudes del MAS, donde el ala izquierda logró que se apruebe documentos políticos con reivindicaciones sociales importantes, como la nacionalización de las minas que están en manos de empresas transnacionales (Taboada, 2011). Pero las corrientes izquierdistas dentro del MAS no estaban bien organizadas, y finalmente los sectores conservadores tomaron la dirección, apoyados por grupos derechistas infiltrados, que oportunamente habían subido al carro del vencedor (Mendoza, 2009). Cabe recordar que el número de puestos laborales en el aparato público creció con 74,5% entre 2005 y 2015 (Mamani, 2016), señal que la burocracia ganó una más sólida base de maniobra en el oportunismo y el clientelismo, que le permitió además degradar el debate político en el partido. Como resultado, la vida del partido se encerró en una pugna interna para conquistar espacios de poder y pegas (empleos públicos). En vez que los militantes sean el cauce para conectar las demandas sociales con la lucha por el socialismo, los bases fueron llamados a ser simples activistas electorales. En este contexto también se produjo algunas escisiones de MAS, de ministros, exministros, y militantes de base (Curi, 2015), y de poco a poco las corrientes procapitalistas en el partido se fortalecieron.

### ***2014-2018: Colaboración de clases***

En el 2014 Álvaro García Linera afirmó; *“El MAS ya no es el de 2005, ha ido mudando la propuesta, ya no es tan comunitario, ahora ha abrazado el ‘modelo cruceño’, que es capitalista”* (Ortiz and Salvatierra, 2014). Esta búsqueda de colaboración de clases también se reflejó en las elecciones generales del 2014 como las subnacionales en 2015, donde el MAS había invitado a muchas personas de derecha a candidatear para el partido (Lucha de Clases, 2014). La dirección nacional del partido pensaba, que para conquistar el voto de la clase media es necesario moderar el programa recurriendo a invitados que no sean identificables con las luchas sociales. Y las tránsfugas oportunamente se ponen la camiseta de MAS para lograr tener un cargo político y obtener beneficios económicos. Pero, como dijo el líder socialista boliviano Marcelo Quiroga Santa Cruz, en política *“hay sumas que restan”* (Rodas, 2010). Porque con este tipo de alianzas se va sembrando desconfianza y decepción en la militancia y los sectores sociales de trabajadores y campesinos, y por lo tanto se acaba por fortalecer a la derecha (Rodas, 2010). Estas nuevas alianzas también fueron cuestionadas por las bases, como en el municipio de Pailón en el departamento de Santa Cruz, donde un dirigente de MAS dijo; *“da mucha pena, que nuestro partido, que antes era un instrumento político por la soberanía de los pueblos, un partido de los pobres, hoy paulatinamente se esté convirtiendo en un partido de la derecha”* (Erbol, 2014).

En las elecciones presidenciales de 2014 Evo Morales logró el 61,36% de los votos a su favor, mientras que el total de votos conseguidos por los candidatos del MAS en las elecciones subnacionales de 2015 llegó a 41,79% (Cuiza, 2016). En estas elecciones subnacionales el MAS perdió en casi todas las más pobladas ciudades del país a los partidos tradicionales de derecha, incluso en la ciudad de El Alto, epicentro de la Guerra del Gas en 2003 (Cuiza, 2016). Pero luego el gobierno ha intentado abrazar aún más el modelo capitalista, coqueteando con empresarios y agroindustriales, ofreciéndoles garantías y una representación política (Saavedra, 2015; Tierra, 2017). En ella, la burguesía nacional y las empresas transnacionales encuentran una ventaja, porque como dice el ex viceministro de Tierras del gobierno de Evo, Alejandro Almaraz, ahora *“los intereses empresariales encuentran la protectora y viabilizadora legitimación política y social que las leyes e instituciones de los gobiernos pasados no pudieron darles”* (Almaraz, 2015). Para mantener una legitimación política y social, el gobierno ha intentado cooptar las organizaciones sociales (Almaraz, 2015), o fomentando divisiones (Paredes, 2018), tildando de derechista o imperialista cualquier reclamo o movilización que ha venido en su contra (ABI, 2010; El Día, 2012; Lucha de Clases, 2015). Un ejemplo fue en abril 2017, cuando Álvaro García Linera hizo un duro discurso contra los “colonialistas ambientalistas”, refiriéndose a una marcha de centenares de indígenas, que protestaban contra el ingreso de YPFB y Petrobras al área protegida “Tariquía” en Tarija, que ellos habitan (Somos Sur, 2017).

Pero es evidente que el gobierno corre el riesgo de entrar en una crisis de legitimidad con los sectores sociales, porque según Jaime Quispe de la Central Obrera Boliviana (COB), “*hay un descontento generalizado contra el gobierno. Como trabajadores hemos cumplido con el proceso de cambio, pero lamentablemente este gobierno no nos respeta, más bien va en desmedro de nosotros”.*

El descontento popular provocó una derrota electoral el 21 de febrero 2016, en un referéndum constitucional sobre la posibilidad de que Evo podía volver a postularse. Luego, en 2017, una sentencia del Tribunal Constitucional Plurinacional admitió la reelección indefinida de todas las autoridades electas del país. Por eso lo más probable es que la elección en 2019 resulta en un gobierno y un parlamento debilitados, donde se va a practicar aún más la política de colaboración de clases. Sin embargo, las condiciones objetivas también abren un espacio político a la izquierda del MAS. Como dice Jaime Quispe de COB; *“´Hemos planteado una nacionalización sin indemnización, pero al final no ha sido cumplido. No compartimos que esos dineros vayan a favor de los transnacionales. Vamos a pelear. No vamos a permitir, que carguen las cargas a la población (…) No podemos permitir que este gobierno actúe en contra de los pueblos indígenas y de los trabajadores. Luchamos por los derechos y beneficios de todos los bolivianos y bolivianas”* (Entrevista, La Paz, 29 de julio 2016).

## **Conclusión**

La lucha por la nacionalización de los hidrocarburos abrió el pasó para la victoria de Evo Morales en 2005. El pueblo empobrecido esperaba por fin acabar con el saqueo de Bolivia. Pero los contratos firmados con las transnacionales en 2006 abrogan la nacionalización. A pesar de eso, se vivió un periodo de bonanza económica entre 2006 y 2014, debido al Impuesto Directo a los Hidrocarburos (IDH), vigente desde 2005, los altos precios internacionales de gas y petróleo, y los mayores volúmenes exportados. Entonces se creyó que era posible lograr una independencia económica sin enfrentarse con las transnacionales, pero en realidad, las petroleras han consolidado su posición dominante en el sector, y en un momento de desaceleración en la economía boliviana, el gobierno se ha visto empujado a cumplir una agenda que coincide muy bien con los intereses de las transnacionales. Como dice de Janvry (1981, pp 197) *“It is this contradictory position of exclusion and dependence that both limits the reformist capacity of the state and commits it, however autonomous it may appear for purposes of legitimation, to the promotion of the conditions necessary for accumulation”.*

Estos últimos retrocesos del gobierno son el resultado de diferentes factores económicos y políticos, que están dialécticamente interrelacionados como he mostrado acá. La persistencia de la dominación de los transnacionales petroleras, el constante desafío de encontrar nuevas reservas de gas, la alta dependencia de la renta petrolera para gastos públicos y el fracaso de la diversificación económica, y la degeneración política del MAS, juntos han asegurado que el proyecto del MAS no logró sus objetivos. El gobierno del MAS ha cubierto estas políticas en un discurso revolucionario, pero corre el riesgo de entrar en una crisis de legitimidad con los sectores sociales, porque su política extractivista ha exacerbado los procesos de acumulación por desposesión.

## **Referencias**

ABI (Agencia Boliviana de Información)

2008a *“Gobierno y Conalde firman preacuerdo y dan paso al diálogo”* <https://www.bolivia.com/noticias/autonoticias/DetalleNoticia39273.asp> (accessed July 17, 2018)

2008b *“Asambleísta afirma que se modificaron 146 artículos de la nueva Constitución”* http://eju.tv/2008/10/asamblesta-afirma-que-se-modificaron-146-artculos-de-la-nueva-constitucin/ (accessed July 17, 2018)

2010 *“García Linera denuncia “contrarrevolución” detrás de huelga general indefinida de COB en Bolivia”* <http://eju.tv/2010/05/los-campesinos-bartolinas-y-cocaleros-se-desmarcan-de-la-cob-para-apoyar-al-gobierno/> (accessed July 17, 2018)

Andreucci, Diego

2016 *“Governing extraction. Regulation, the state and social struggles over minerals and hydrocarbons in Bolivia”,* PhD tesis, Autonomous University of Barcelona

Anthias, Penelope

2018 “Indigeneous Peoples and the New Extraction. From Territorial Rights to Hydrocarbon Citizenship in the Bolivian Chaco”*, Latin American Perspectives* 45 (5), 136-153

Almaraz, Alejandro

2015 “El MAS abraza el modelo capitalista -prologo*” Petropress* no. 35

Arostegui, Martin

2008 *“Anti-Morales insurgents threaten Bolivian pipeline”,* CNN, http://edition.cnn.com/2008/WORLD/americas/09/09/bolivia.unrest/index.html (accessed July 17, 2018)

Arze, Carlos

2013 “´Nacionalización´ de los hidrocarburos del gobierno del MAS: balance y perspectivas”*,* *Hora 25* no. 104

2015 *“Ley de incentivos: mayores ganancias para las transnacionales”,* La Paz, CEDLA

2018 “Conflicto Incahuasi: la pelea de los “hermanos pobres””*, Perspectiva Energética* 19, CEDLA

BBC

2007 *“La verdadera nacionalización”,* http://news.bbc.co.uk/hi/spanish/latin_america/newsid_6312000/6312513.stm (accesed October 31, 2018)

Bolpress

2005 *“Nacionalización del gas es la única salida”* <http://www.bolpress.net/art.php?Cod=2005001061> (accessed July 17, 2018)

2008 *“Continúa el cerco a Santa Cruz”* https://www.bolpress.com/?Cod=2008091716 (accessed July 17, 2018)

Brand, Ulrich; Dietz, Kristina and Lang, Miriam

2016 *”Neo-Extractivism in Latin America. One Side of a New Phase of Global Capitalist Dynamics*”. Ciencia Política, 11(21), 125-159

Campanini, Jorge

2015 “Hacia la consolidación de la amazonía petrolera” *Petropress* no. 35

CEDLA (Centro de Estudios para el Desarrollo Laboral y Agrario)

2007, “Los Costos Recuperables devuelven todo a las petroleras”*, Alerta Laboral* no. 49

CJA (Centro Juana Azurduy)

2008 “Anexo no. 4: Propuesta de Nueva Constitución Política del Estado”, *Bitácora de la Asamblea Constituyente 2006-2007”,* Centro Juana Azurduy

CPR (Coordinadora Plurinacional de la Reconducción)

2011 *“Por la recuperación del proceso de cambio para el pueblo y con el pueblo”* http://vientosur.info/spip.php?article5583 (accessed July 17, 2018)

Cuiza, Paulo

2016 *“La historia de los procesos electorales entre 2005 y 2016”* http://www.la-razon.com/nacional/historia-procesos-electorales_0_2440555959.html (accessed Octuber 10, 2018).

Curi, Marco

2015 *“Candidaturas provoca disidencias en el MAS”,* El Día, January 5

de Janvry, Alain

1981 *“The Agrarian Question and Reformism in Latin America”,* Baltimore and London, The John Hopkins University Press

Econoticiasbolivia

2005a *“Salida revolucionaria con Asamblea Popular Nacional de Bolivia, plantean movimientos populares para reemplazar a Mesa”*  <https://www.aporrea.org/actualidad/n61527.html> (accessed July 17, 2018)

2005b *“Bolivia hace un alto en la lucha por la nacionalización”* <http://argentina.indymedia.org/news/2005/06/299813.php> (accessed July 17, 2018)

El Día

2011 *“COB en paro jueves y viernes”,* El Día, Octuber 4

2012 *“La marcha del TIPNIS es rehén del MSM y la derecha”,* El Día, July 2

El País

2016 *“La injerencia brasilera provocó la salida de Soliz”,* El País, September 9

Erbol

2012 *“En el censo de 2001 Bolivia tenía 8.274.325 habitantes; ¿cuánto creció hasta 2012?”,*Erbol, November 21

2014 *“En Pailón rechazan alianza del MAS y ‘oposición tradicional’”,*  [Erbol,](http://www.erbol.com.bo/noticia/politica/02102014/en_pailon_rechazan_alianza_del_mas_y_oposicion_tradicional) October 2

2016 *“Aseguran que DS 2366 vulnera 5 tratados internacionales”,* Erbol, January 8

Escobar de Pabón, Silvia; Rojas, Bruno y Arze, Carlos

2014 *“País sin industrias, país con empleos precarios: Situación de los derechos laborales en Bolivia, 2011-2012”,* La Paz, CEDLA

Farthing, Linda and Kohl, Benjamin

2014 *“Evo's Bolivia: Continuity and Change”,* Austin, University of Texas Press

Fernández, Roberto

2016 *“Balances a 10 años de "nacionalización" de los hidrocarburos del MAS - entrevista”* <http://www.somossur.net/economia/hidrocarburos-y-energia/1781-balances-a-10-anos-de-nacionalizacion-del-mas.html> (accessed July 17, 2018)

Figueras, Amanda

2005 *“La ley de hidrocarburos no importa, está en juego la viabilidad del país”*, El Mundo, June 7

Fuentes, Federico and Munckton, Stuart

2008 *“Bolivia: Fascist right launches 'civic coup'”,* Green Left Weekly, Issue 767

Galeano, Eduardo

1973 *“Las venas abiertas de América Latina”,* México, D.F., siglo XXI editores

Gandarillas, Marco and Rodríguez, Gustavo

2011 *“Mitos de la inversión extranjera. El caso de los hidrocarburos”,* Cochabamba, CEDIB

García Linera, Álvaro

2011 *“El “oenegismo”, enfermedad infantil del derechismo”,* La Paz, Vicepresidencia del Estado Plurinacional

Gasparini, Leonardo; Cicowiez, Martín; Sosa Escudero, Walter

2012 *“Pobreza y Desigualdad en América Latina: Conceptos, Herramientas y Aplicaciones”,* Universidad Nacional de La Plata, Buenos Aires, CEDLAS

Gilbert, Abel

2010 *“El 'gasolinazo' pone en aprietos a Evo Morales”,* [El](https://www.elperiodico.com/es/internacional/20101231/el-gasolinazo-pone-en-aprietos-a-evo-morales-644841) Periódico, December 31

GoB (Gobierno de Bolivia)

2001 *“Decreto 26171”,* La Paz, Gaceta Oficial

2005 *“Ley 3058”*, La Paz, Gaceta Oficial

2006a *“Decreto Supremo no 28701”*, La Paz, Gaceta Oficial

2006b *“Plan Nacional de Desarrollo”,* https://extranet.who.int/nutrition/gina/sites/default/files/BOL%202006%20-%20Plan%20Nacional%20de%20Desarrollo.pdf (accessed July 17, 2018)

2009 *“Constitución Política del Estado Plurinacional de Bolivia,* La Paz, Gaceta Oficial

2014 *“Decreto Supremo no. 2195”,* La Paz, Gaceta Oficial

2015a *“Decreto Supremo no. 2298”,* La Paz, Gaceta Oficial

2015b *“Decreto Supremo no. 2366”,* La Paz, Gaceta Oficial

2015c *“Decreto Supremo no. 2400”,* La Paz, Gaceta Oficial

2015d *“Ley 767”* La Paz, Gaceta Oficial

González Alonso, Silvia; Esteban-Hernández, Jesús; Valcárcel Rivera, Yolanda; Hernández-Barrera, Valentín;

Gil de Miguel, Ángel

2010 *“Contaminación del agua en fuentes cercanas a campos petrolíferos de Bolivia”,* Washington, [Revista Panamericana de Salud Pública](http://www.scielosp.org/scielo.php?script=sci_serial&pid=1020-4989&lng=en&nrm=iso)

Gordon, Gretchen and Luoma, Aaron

2008 “Petróleo y gas: la riqueza ilusoria debajo de sus pies”, *en Desafiando la globalización, Historias de la experiencia boliviana,* La Paz, Plural Editores

Gudynas, Eduardo

2011 “Más allá del nuevo extractivismo: transiciones sostenibles y alternativas al desarrollo”, en *El desarrollo en cuestión: reflexiones desde América Latina,* CIDES-UMSA, La Paz, Plural Editores

Gutierrez Aguilar, Raquel

2005 *“Bolivia y la cuestión de cómo salir del neoliberalismo”,* <http://www.sinpermiso.info/textos/bolivia-y-la-cuestin-de-cmo-salir-del-neoliberalismo> (accessed July 17, 2018)

Harvey, David

2003 *“The New Imperialism”,* Oxford and New York, Oxford University Press

Hora 25

2008 *“Resultados de la Auditoría a Empresas Petroleras”,* La Paz, Hora 25

INE (Instituto Nacional de Estadística)

2012 *“Necesidades Básicas Insatisfechas”,* La Paz

2013 *“Principales resultados del censo nacional de población y vivienda 2012”* La Paz

2018a *“Precio de gas natural”,* La Paz

2018b *“Volumen de ventas internas y externas de gas natural”,* La Paz

Jiménez, Georgina

2013 “Territorios indígenas y áreas protegidas en la mira: la ampliación de la frontera de industrias extractivistas”*, Petropress* no. 31

2015 [“](http://www.cedib.org/publicaciones/geografia-del-extractivismo-en-bolivia-territorios-en-sacrificio-petropress-35-3-16/)Geografía del extractivismo en Bolivia: Territorios en sacrificio[”](http://www.cedib.org/publicaciones/geografia-del-extractivismo-en-bolivia-territorios-en-sacrificio-petropress-35-3-16/)*, Petropress* no. 35

Jubileo

2012 *“Contratos de exploración y explotación de hidrocarburos”,* La Paz, Fundación Jubileo

2016 *“A 10 años de la nacionalización de los hidrocarburos: Entre aciertos y contradicciones”,* La Paz, Fundación Jubileo

2017a *“Renta Petrolera en Bolivia”,* La Paz, Fundación Jubileo

2017b *“Revista Jubileo no. 36”,* La Paz, Fundación Jubileo

2018 *“Revista Jubileo no. 37”,* La Paz, Fundación Jubileo

Kohl, and Farthing, Linda

2012 *“Material constraints to popular imaginaries: The extractive economy and resource nationalism in Bolivia”* Political Geography 31 (4), 225-235

Krommes-Ravnsmed, Jeppe

2014 *“Valg i Bolivia: Revolutionær reformproces eller klassesamarbejde?”,* Copenhagen, Kontradoxa, october 9, http://modkraft.dk/artikel/valg-i-bolivia-revolution-r-reformproces-eller-klassesamarbejde

Lucha de Clases

2014 *“Listas que son un programa”,* <http://luchadeclases.org.bo/nacional/politica/767-listas-que-son-un-programa.html> (accessed July 17, 2018)

2015 *“El tolete es del Estado, la mano es de las multinacionales”,* <http://luchadeclases.org.bo/nacional/movimiento-campesino-e-indigena/944-el-tolete-es-del-estado-la-mano-es-de-las-multinacionales.html> (accessed July 17, 2018)

Mamani, Lidia

2016 *“Los empleos en empresas públicas crecieron 23 veces en una década”,* Página Siete, May 1

MAS-IPSP

2005 *“Programa de gobierno – MAS-IPSP”,* http://www.archivochile.com/Portada/bol_elecciones05/bolelecciones0009.pdf (accessed July 20, 2018)

Melendres, Miguel

2018 *“Planta de Amoniaco y Urea funcionó a plenitud solo en enero y febrero”,* El Deber, April 18

Mendoza, Luz

2009 *“La alianza del MAS-UJC genera malestar en las filas oficialistas”,* http://eju.tv/2009/10/la-alianza-del-mas-ujc-genera-malestar-en-las-filas-oficialistas/(accessed Octuber 9, 2018)

Mollo, Norma

2011 *“A 11 años del derrame de petróleo en el río Desaguadero”,* http://cepaoruro.org/a-11-anos-del-derrame-de-petroleo-en-el-rio-desaguadero-30-01-11/ (accessed July 17, 2018)

OIT (Oficina Internacional del Trabajo)

2016 *“Organizar a los trabajadores de la economía informal – Reseña de políticas OIT-ACTRAV”,* Geneva, Organización Internacional del Trabajo

Orgáz, Mirko

2011 *“Ganancias extraordianarias de las transnacionales”,* La Paz, Hora 25

2012 *“Hablemos de los que mueren: Marcelo y la Agenda de Octubre”,* La Paz, Hora 25

Ortiz, Pablo and Salvatierra, Mónica

2014 *“Sáquense el chip de que el Gobierno va a dar el golpe y a estatizar todo”,* El Deber, [November](http://eju.tv/2014/11/garca-linera-no-hay-hegemona-eterna/) 11

Página Siete

2015 *“Repsol ve a Bolivia como un país "magnífico" para invertir”,* Página Siete, November 17

Paredes, Iván

2018 *“La creación de sectores paralelos surge en medio de los conflictos”,* El Deber, January 7

Paye, Lizandra; Ateaga, Walter y Ormachea, Enrique

2013 *”Compendio de espaciomapas de TIOC y TCO en tierras altas: Tenencia de la tierra y recursos naturales en territorios originarios”,* La Paz, CEDLA

Pereira, José

2010 “Nivelación o gasolinazo, es una victoria de las multinacionales”*, El Militante* no. 11, December 29

Petropress

2008 *“Camiri exige una verdadera Nacionalización de los hidrocarburos”,* Cochabamba, Petropress

Puente, Rafael

2011 *“Recuperando la memoria: Una historia crítica de Bolivia – Tomo 2”,* La Paz, Plural Editores

Rodas, Hugo

2010 *“Marcelo Quiroga Santa Cruz, El socialismo vivido, Tomo III (1978-1980)”,* La Paz, Plural Editores

Saavedra, José

2015 *“El MAS abraza el modelo capitalista”,* Bolivia, Editorial Autodeterminación

Sagárnaga, Rafael

2010 *“Algunas revelaciones de las auditorías petroleras: el temor a Enrique Mariaca”,* http://www.elpaisonline.com/index.php/editorial/item/246650-algunas-revelaciones-de-las-auditorias-petroleras-el-temor-a-enrique-mariaca (accessed July 17, 2018)

Schlez, Mariano

2008 “La explosión interrumpida. Bolivia al borde la guerra civil”, *V Jornadas de Sociología de la UNLP,* La Plata, Universidad Nacional de la Plata

Schneider, Alejandro

2014 “Conflictividad social durante la segunda presidencia de Evo Morales en Bolivia”, *Amérique Latine Histoire et Mémoire.* Les Cahiers ALHIM, 26

Seoane, José

2013 “*Extractivismo, despojo y crisis climática – desafíos para los movimientos sociales y los proyectos emancipatorios de Nuestra América”*, Buenos Aires, Herramienta, El Colectivo

Soliz Rada, Andrés

2008 *“Auditorías petroleras y una lección de dignidad”,* <http://www.rebelion.org/noticia.php?id=67034> (accessed July 17, 2018)

Somos Sur

2017 *“Réplica al discurso del vicepresidente contra los "colonialistas ambientales”,* <http://www.somossur.net/politica/seguimiento-al-nuevo-estado-plurinacional/1979-replica-al-discurso-del-vicepresidente-contra-los-colonialistas-ambientales.html> (accessed July 17, 2018)

Sosa, Rafael

2010 *“Evo Morales abroga Decreto Supremo 748”,* <https://www.eldia.com.bo/index.php?cat=357&pla=3&id_articulo=50606> (accessed July 17, 2018)

Spronk, Susan and Webber, Jeffery R.

2007 *”Struggles against Accumulation by Dispossession in Bolivia: The Political Economy of Natural Resource Contention”,* Latin American Perspectives, Vol. 34, No. 2, 31-47

Stefanoni, Pablo

2010 *“Bolivia: por el “gasolinazo” se dispara el precio de los alimentos”,* <https://www.clarin.com/mundo/Bolivia-gasolinazo-dispara-precio-alimentos_0_BJcBpv_pP7x.html> (accessed July 17, 2018)

Tabera, Gabriel

2004 *“Hay 800 mil nuevos pobres en Bolivia”,*  <http://www.voltairenet.org/article122332.html> (accessed July 17, 2018)

Taboada, Gastón

2011 *“El congreso nacional de juventudes y la lucha contra la derecha interna”,* El Militante no.11, Potosí

TIERRA

2011 *”Territorios Indígena Originario Campesinos en Bolivia: Entre la Loma Santa y la Pachamama”,* La Paz, Fundación TIERRA

2017 *“*[*Acuerdos entre el Gobierno nacional y los agroempresarios*](http://www.ftierra.org/index.php/transformaciones-agrarias-y-rurales/790-acuerdos-entre-el-gobierno-nacional-y-los-agroempresarios)*”* http://www.ftierra.org/index.php/transformaciones-agrarias-y-rurales/790-acuerdos-entre-el-gobierno-nacional-y-los-agroempresarios (accessed July 17, 2018)

Trigo, Maria Silvia

2017 *“Estudio de Brasil alerta agotamiento de pozos de gas boliviano”,* El Deber, July 1

Yañez, Patricia and Landa, Fernando

2007 *“La informalidad en el mercado laboral urbano, 1996-2006”,* Documento de Trabajo, UDAPE

YPFB (Yacimientos Petroleros Fiscales de Bolivia)

2015, *“Boletín Estadístico Gestión 2014”,* La Paz, YPFB

Zegada, Alejandro

2015 *“Entrevista al académico italiano Diego Andreucci: No amenazar intereses transnacionales limitó el proceso de cambio”*, El Pais, Octuber 19

Zibechi, Raúl

2009 *“Bolivia: Plan 3000 – Resistance and Social Change at the Heart of Racism”,* <http://upsidedownworld.org/news-briefs/news-briefs-news-briefs/bolivia-plan-3000-resistance-and-social-change-at-the-heart-of-racism/> (accessed July 17, 2018)

Vila, Nelson and Orgáz Mirko

2014 *“La industrialización de Bolivia, una asignatura pendiente”,* La Paz, Hora 25

Watts, Michael

2009 *“Oil, Development, and the Politics of the Bottom Billion”* Macalester International 24, article 11

Webber, Jeffery R.

2009 “From Naked Barbarism to Barbarism with Benefits: Neoliberal Capitalism, Natural Gas Policy, and the Evo Morales Government in Bolivia” In *Post-neoliberalism in the Americas,* ed. Arne Ruckert and Laura Macdonald, 105-19, New York: Palgrave Macmillan

2017 *“The Last Day of Oppression, and the First Day of the Same: The Politics and Economics of the New Latin American Left”,* London, Pluto Press

World Bank

2018 “*GINI index – Bolivia”,* Washington, DC.
